# Supplementary material
Source: publisher site journal article supplement (https://www.spandidos-publications.com/8258/downloadSupplementary)

Figure S1. (A) Correlation between serum miR-1246 levels and age in patients with lung adenocarcinoma. (B) Correlation between serum miR-1246 levels and age in all healthy controls of the present study. Young participants (20-22 years old), whose samples were collected on the same day, are shown as black dots. (C) Correlation between serum miR-1246 levels and age in healthy controls, excluding young participants (shown as black dots in B). (D) Correlation between serum miR-1246 levels and age in healthy controls (64-91 years old) from our previous study (21). Lung adeno., lung adenocarcinoma; HC, healthy controls; miR, microRNA.

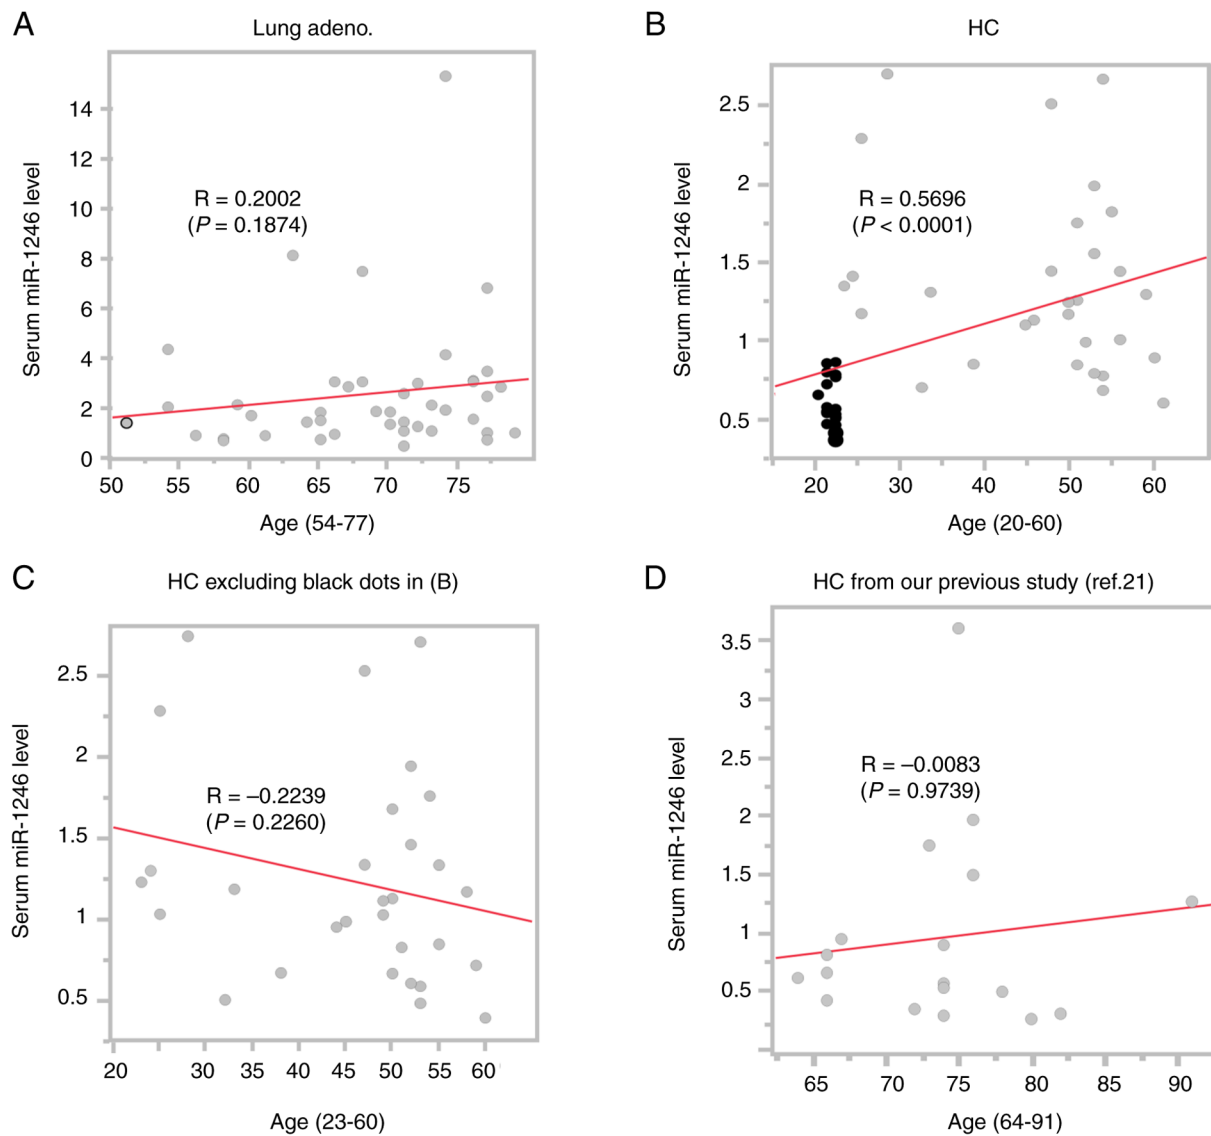

Figure S2. (A) Histogram of RNU2-1 copy number per diploid in the current healthy controls determined by digital PCR. (B) Histogram of RNU2-1 copy number per diploid in the current patients with lung adenocarcinoma determined by digital PCR. (C) Histogram of RNU2-1 copy numbers per diploid was generated using the data supplied as the Additional File 3 in Schaap *et al* (19), which included 270 individuals and was analyzed by pulsed-field gel electrophoresis and Southern blot analysis. Lung adeno., lung adenocarcinoma; HC, healthy controls; miR, microRNA; PCR, polymerase chain reaction.

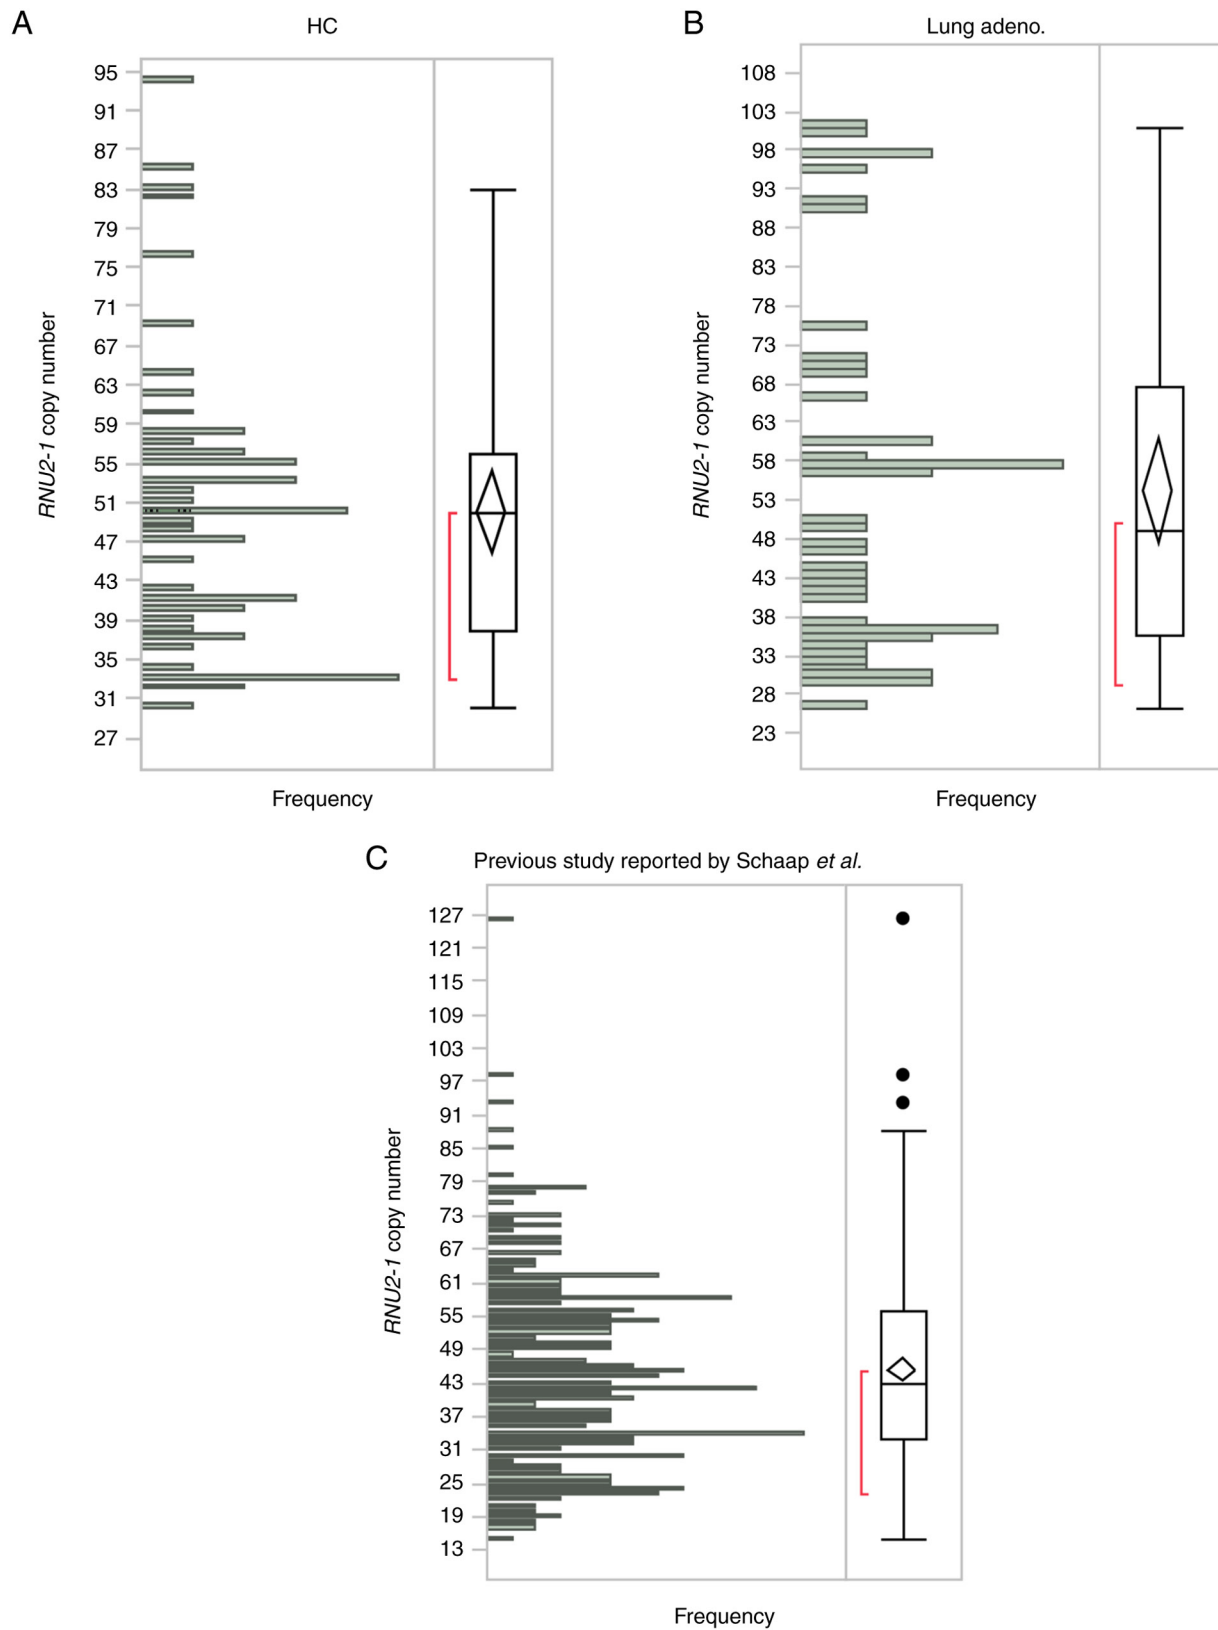

Supplement: Supplementary file 1 [file downloadSupplementary]
